# Supplementary material
Source: Springer Nature journal article supplement (https://www.springermedizin.de/resource/supplementary/12913_2008_833_MOESM3_ESM.pdf/9535680)
Supplement: MOESM3 [file 9535680]

Characteristics of excluded studies

| Study         | Reason for exclusion                                                                                                                                                                                                                                                        |
|---------------|-----------------------------------------------------------------------------------------------------------------------------------------------------------------------------------------------------------------------------------------------------------------------------|
| Abe 2001      | The investigators compared two cohorts (short and long program). Study design: high risk of bias.                                                                                                                                                                           |
| Bailey 1998   | The investigators used a pre- post comparison. Study design: high risk of bias.                                                                                                                                                                                             |
| Board 2000    | The investigators used a RCT design to compare "usual hospital care versus home care (hospital in the home). Setting not comparable.                                                                                                                                        |
| Du Pen 1999   | The investigators used a multi-center RCT design to compare "best practice cancer care versus standard practice (usual care). Community setting not comparable.                                                                                                             |
| Fine 2003     | The investigators used a seven site cluster RCT design to compare "pneumonia guideline dissemination ( via E-Mail)" versus a multifaceted intervention strategy (experimental pneumonia pathway). Design at high risk of bias as a direct result of unit of analyses error. |
| Fridlin 1996  | The investigators used a time series. Study design not met.                                                                                                                                                                                                                 |
| Kagan 2002    | The investigators used a pre- post comparison. Study design: high risk of bias.                                                                                                                                                                                             |
| Keetch 1998   | The investigators used a (controlled) pre- post comparison. Study design not met.                                                                                                                                                                                           |
| Kelly 2000    | The investigators compared a prospective cohort with a historical matched control. Study design not met.                                                                                                                                                                    |
| Kight 1999    | The investigators used a (controlled) pre- post comparison. Study design not met.                                                                                                                                                                                           |
| Kim 2001      | The investigators used a pre- post comparison. Study design not met.                                                                                                                                                                                                        |
| Leibman 1998  | The investigators used a (controlled) pre- post comparison. Study design not met. .                                                                                                                                                                                         |
| McKinsey 1999 | The investigators used a pre- post comparison. Study design not met.                                                                                                                                                                                                        |
| Melbert 2002  | The investigators used a case-control design. Study design not met.                                                                                                                                                                                                         |
| Metersky 2001 | The investigators used a pre- post comparison. Study design not met.                                                                                                                                                                                                        |
| Miller 2002   | The investigators compared a 5-year cohort with a historical control. Study design not met.                                                                                                                                                                                 |

**Characteristics of excluded studies** (Continued)

|                |                                                                                                                                                                                                     |
|----------------|-----------------------------------------------------------------------------------------------------------------------------------------------------------------------------------------------------|
| Nanly 2005     | The investigators used a pre- post comparison. Study design not met.                                                                                                                                |
| O'Brien 2000   | The investigators used a pre- post comparison with 3 measures in time. Study design not met.                                                                                                        |
| Ogawa 2004     | The investigators used a pre- post comparison. Study design not met.                                                                                                                                |
| Palmer 2000    | The investigators used a cluster RCT design to compare 9 intervention hospitals with 10 control hospitals. The intervention was a pneumonia pathway. Double publication, please see Marrie TJ 2000. |
| Pearson 2000   | The investigators used a pre- post comparison. Study design not met.                                                                                                                                |
| Pearson 2001   | The investigators used a pre- post comparison. Study design not met.                                                                                                                                |
| Perry 2003     | The investigators used a pre- post comparison. Study design not met.                                                                                                                                |
| Pestian 1998   | The investigators used a pre- post comparison. Study design not met.                                                                                                                                |
| Peter 2004     | The investigators used a pre- post comparison. Study design not met.                                                                                                                                |
| Porter 1998    | The investigators used a pre- post comparison. Study design not met.                                                                                                                                |
| Pritts 1999    | The investigators compared an experimental group with a concurrent and a historical control group. Study design not met.                                                                            |
| Pronovost 2002 | The investigators used a time series. Study design not met.                                                                                                                                         |
| Ranjan 2003    | The investigators used a case-control design. Study design not met.                                                                                                                                 |
| Riegel 1996    | The investigators used a pre- post comparison. Study design not met.                                                                                                                                |
| Roberts 2004   | The investigators used a (controlled) pre- post comparison. Study design not met.                                                                                                                   |
| Roman 2001     | The investigators used a pre- post comparison. Study design not met.                                                                                                                                |
| Ross 1997      | The investigators compared 2 (years) cohorts. Study design: high risk of bias.                                                                                                                      |
| Ross 2004      | The investigators used a case-control design. Study design not met.                                                                                                                                 |
| Sanders 2002   | The investigators compared 2 patient cohorts from 2 hospitals: high risk of bias.                                                                                                                   |

**Characteristics of excluded studies** (Continued)

|               |                                                                                                                                                                                                       |
|---------------|-------------------------------------------------------------------------------------------------------------------------------------------------------------------------------------------------------|
| Schriger 1997 | The investigators used a time series. Study design not met.                                                                                                                                           |
| Short 1997    | The investigators used a pre- post comparison. Study design not met.                                                                                                                                  |
| Smith 1999    | The investigators used a time series. Study design not met.                                                                                                                                           |
| Stoller 1998  | The investigators used a RCT design. Study quality assessment: Randomization process not reported. Allocation concealment not sure. Study quality: high risk of bias. Quality criteria not met.       |
| Stone 2005    | The investigators used a multi-center RCT design. Study quality assessment: High risk of exclusion bias, many patients excluded from the study after randomization. Study quality: high risk of bias. |
| Summers 1998  | The investigators used a time series design. Study design not met.                                                                                                                                    |
| Thomas 2003   | The investigators used a 3year cohort study with a historical control. Study design: high risk of bias.                                                                                               |
| Turley 1994   | The investigators used a case-control design with matched pairs. Study design not met.                                                                                                                |
| Unemura 2002  | The investigators evaluated staff satisfaction pre- and post intervention. Study design: measures not objective. High risk of bias.                                                                   |
| Walsh 2001    | The investigators compared 3 study cohorts in a pre- post comparison. Study design: high risk of bias.                                                                                                |
| Warner 2002   | The investigators used a time series design. Study design not met.                                                                                                                                    |
| Waters 1999   | The investigators used a pre- post comparison with 3 measures reported. Study design: high risk of bias.                                                                                              |
| Wilson 2002   | The investigators used a case-control design with matched pairs. Study design not met.                                                                                                                |
| Yueh 2003     | The investigators used a (controlled) pre- post design. Study design: high risk of bias.                                                                                                              |
